# Supplementary material for: Degree of methylation burden is determined by the exposure period to carcinogenic factors
Source: PubMed Central journal article supplement (PMC5378290; doi:10.1111/cas.13136), 2017-04-03
Supplement: CAS-108-316-s003.pdf [file CAS-108-316-s003.pdf]

Table S1. Primers used for DNA methylation analysis and expression analysis.

| Gene         | Type | Forward primer sequence     | Reverse primer sequence   | Annealing temperature (°C) | Reference  |
|--------------|------|-----------------------------|---------------------------|----------------------------|------------|
| HE6          | M    | CGGTTGGGACGTCGCGGGTCGTC     | CTAAAATACGCACCGATAACCGCG  | 72                         | 1)         |
| SB5          | M    | GGGGATCGATTTTAAACGTTCGC     | CAAACCTCAAACCGCCACGTCCG   | 72                         | 1)         |
| SA9          | M    | GATTCGTAAGAAATACGAGCGGATC   | AACGTTATCGATAAACTCGCCTCG  | 72                         | 1)         |
| SD2          | M    | GCGCGGGGTTTTTCGAGGTTTC      | GCCATCACCTCCCATCGTAAACG   | 72                         | 1)         |
| SD2          | U    | TGTGAGTGTGGGGTTTTTGGAGTTT   | ACACCATCACCTCCCATCATAAACA | 62                         | 1)         |
| B2 repeat    | N    | AGATGGTTGTGAGTTATTATGTG     | CTATTCTTCCAAAAATCCTAAAT   | 51                         | 1)         |
| HE6          | BS   | GTATTTTAGGGTTGAGGATAAAATAGA | AAACACTCAAACATCCCTTC      | 60                         | This study |
| SA9          | BS   | AGGATTGGTGTTTTAGGATTT       | CTAACCCAACATAAAACCCCTTC   | 54                         | This study |
| <i>Cd14</i>  | RT   | TGTCCAACAAGTTTCCGGCACT      | TCCAGTTCCTGCGGCTGTACCTT   | 69                         | 1)         |
| <i>Cd3g</i>  | RT   | CGAGGCGTGTTCAGTGTCAAGG      | GCGAAGAAGAAGCCGAATATGGT   | 54                         | 1)         |
| <i>Ela2</i>  | RT   | GCTACCATCAACGCCAACGTG       | GCTGGGTGAGGGTCCGGTTTGTGC  | 69                         | 1)         |
| <i>Il1b</i>  | RT   | AACAGTGGGCAGGATATAGTTGA     | CCCATCTGGCAGAGGACTAAGG    | 66                         | 1)         |
| <i>Nos2</i>  | RT   | CGAGCCCAAGGTCTACGTCCAA      | CGCACGTCTCCGCAGACATAGAG   | 60                         | 1)         |
| <i>Tnf</i>   | RT   | GCATGGAGCTCAGGGACAACCAG     | GGCTGACGGTGTGCGTGAGGA     | 69                         | 1)         |
| <i>Nptx2</i> | RT   | CCGCGCCATCACCTCCCATCGT      | AAAGCGGCCACAGAAAGCGTTG    | 62                         | 1)         |

M, primers specific to methylated DNA; U, primers specific to unmethylated DNA; N, primers for normalization of qMSP; BS, primers for deep bisulfite sequencing; RT, primers for quantitative RT-PCR; and 1) Niwa et al., Cancer Res, 70:1430-1440, 2010.
